# Supplementary material for: Impact of Nutrition and Physical Activity Interventions Provided by Nutrition and Exercise Practitioners for the Adult General Population: A Systematic Review and Meta-Analysis
Source: Nutrients. 2022 Apr 21;14(9):1729. doi: 10.3390/nu14091729 (PMC9103154; doi:10.3390/nu14091729)
Supplement: Supplementary file 1 [file nutrients-14-01729-s001.zip › Supplementary Material/Supplementary Table 1.pdf]

**Table S1.** Full search strategy for literature search of databases for the systematic review examining the effect of nutrition and physical activity interventions.

| <b>Search Date</b> | <b>Database</b>                                        | <b>Results</b> |
|--------------------|--------------------------------------------------------|----------------|
| April-2-2021       | Medline Complete (Ebsco)                               | 8,787          |
| April-2-2021       | Medline Complete (Ebsco)                               | 496            |
| April-2-2021       | CINAHL (Ebsco)                                         | 4755           |
| March-28-2021      | Cochrane Database of Systematic Reviews (Ebsco)        | 9              |
| April-2-2021       | Cochrane Central Database of Controlled Trials (Ebsco) | 5538           |
| April-2-2021       | SportDiscus (Ebsco)                                    | 989            |
|                    | Total before duplicate removal                         | 20,574         |
|                    | Duplicates                                             | 9369           |
|                    | Total (Sent for Title/abstract screening)              | 11205          |

# MEDLINE

| #  | Query [Medline Complete, Ebsco, April 2, 2021]                                                                                                                                                                                     | Results | Limiters/Expanders            |
|----|------------------------------------------------------------------------------------------------------------------------------------------------------------------------------------------------------------------------------------|---------|-------------------------------|
| 1  | MH "Diet+"                                                                                                                                                                                                                         | 290,364 | Search modes - Boolean/Phrase |
| 2  | TI (diet or diets or dietary or nutrition* ) OR AB (diet or diets)                                                                                                                                                                 | 506,928 | Search modes - Boolean/Phrase |
| 3  | MH "Eating"                                                                                                                                                                                                                        | 53,870  | Search modes - Boolean/Phrase |
| 4  | TI eating                                                                                                                                                                                                                          | 27,057  | Search modes - Boolean/Phrase |
| 5  | AB (eating habit or eating habits) OR AB (dietary intake OR dietary habit*)                                                                                                                                                        | 63,343  | Search modes - Boolean/Phrase |
| 6  | AB ((healthy OR unhealthy or nutritional) N2 (eating or meal or meals))                                                                                                                                                            | 9,593   | Search modes - Boolean/Phrase |
| 7  | S1 OR S2 OR S3 OR S4 OR S5 OR S6                                                                                                                                                                                                   | 703,679 | Search modes - Boolean/Phrase |
| 8  | MH "Exercise+"                                                                                                                                                                                                                     | 205,240 | Search modes - Boolean/Phrase |
| 9  | TI (exercise or exercising or exercised or physical activity or physical activities OR aerobic activity or aerobic activities OR ((aerobic* or fitness or pilates or yoga) N2 (class or classes))                                  | 270,818 | Search modes - Boolean/Phrase |
| 10 | AB (physical activity or physical activities or physical fitness or fitness routine or fitness class or fitness classes or aerobic exercis*) OR AB ((regular or daily or routine or weekly or week or weeks) N2 (exercis* or gym)) | 150,235 | Search modes - Boolean/Phrase |
| 11 | TI ((regular or daily or routine or weekly or week or weeks) N2 gym)                                                                                                                                                               | 2       | Search modes - Boolean/Phrase |
| 12 | AB (aerobic activity or aerobic activities OR ((aerobic* or fitness or pilates or yoga) N2 (class or classes))                                                                                                                     | 4,919   | Search modes - Boolean/Phrase |
| 13 | S8 OR S9 OR S10 OR S11 OR S12                                                                                                                                                                                                      | 384,203 | Search modes - Boolean/Phrase |
| 14 | MH "Muscle Strength+"                                                                                                                                                                                                              | 35,931  | Search modes - Boolean/Phrase |

|    |                                                                                                                                                                                                                                                                                                                                                          |           |                               |
|----|----------------------------------------------------------------------------------------------------------------------------------------------------------------------------------------------------------------------------------------------------------------------------------------------------------------------------------------------------------|-----------|-------------------------------|
| 15 | TI (anthropomorphic* N2 (measur* OR test# or testing or tested)) OR AB (anthropomorphic* N2 (measur* OR test# or testing or tested))                                                                                                                                                                                                                     | 704       | Search modes - Boolean/Phrase |
| 16 | S14 OR S15                                                                                                                                                                                                                                                                                                                                               | 36,633    | Search modes - Boolean/Phrase |
| 17 | (MH "Cognitive Behavioral Therapy+") OR (MH "Behavior Therapy+") OR (MH "Directive Counseling+") OR (MH "Counseling")                                                                                                                                                                                                                                    | 117,018   | Search modes - Boolean/Phrase |
| 18 | ( TI (counseling or counselling or counselor* or counsellor* or motivational interview* or directive therapy or ((behavior* or behaviour*) N2 (intervention or interventions OR therapy or therapies))) ) OR ( AB (counseling or counselling OR motivational interview* or directive therapy or ((behavior* or behaviour*) N2 (therapy or therapies))) ) | 129,118   | Search modes - Boolean/Phrase |
| 19 | S17 OR S18                                                                                                                                                                                                                                                                                                                                               | 205,895   | Search modes - Boolean/Phrase |
| 20 | MH "Overweight" OR MH "Obesity+"                                                                                                                                                                                                                                                                                                                         | 230,985   | Search modes - Boolean/Phrase |
| 21 | TI (overweight or obese or obesity) OR AB (overweight or obese or obesity)                                                                                                                                                                                                                                                                               | 331,309   | Search modes - Boolean/Phrase |
| 22 | S20 OR S21                                                                                                                                                                                                                                                                                                                                               | 381,450   | Search modes - Boolean/Phrase |
| 23 | (MH "Randomized Controlled Trials as Topic+")                                                                                                                                                                                                                                                                                                            | 145,086   | Search modes - Boolean/Phrase |
| 24 | (ZT "randomized controlled trial")                                                                                                                                                                                                                                                                                                                       | 524,962   | Search modes - Boolean/Phrase |
| 25 | ( TI (randomised or randomized OR trial) ) OR ( AB (randomized or randomised or randomly))                                                                                                                                                                                                                                                               | 1,061,371 | Search modes - Boolean/Phrase |
| 26 | (ZT "controlled clinical trial")                                                                                                                                                                                                                                                                                                                         | 94,070    | Search modes - Boolean/Phrase |
| 27 | TI (placebo*) OR AB (placebo*)                                                                                                                                                                                                                                                                                                                           | 223,105   | Search modes - Boolean/Phrase |
| 28 | (MH "Randomized Controlled Trial")                                                                                                                                                                                                                                                                                                                       | 524,962   | Search modes - Boolean/Phrase |

|    |                                                                                                                                                                                                                                                                                                                        |           |                               |
|----|------------------------------------------------------------------------------------------------------------------------------------------------------------------------------------------------------------------------------------------------------------------------------------------------------------------------|-----------|-------------------------------|
| 29 | S23 OR S24 OR S25 OR S26 OR S27 OR S28                                                                                                                                                                                                                                                                                 | 1,364,479 | Search modes - Boolean/Phrase |
| 30 | MH ("Animals+") NOT MH ("humans")                                                                                                                                                                                                                                                                                      | 4,800,917 | Search modes - Boolean/Phrase |
| 31 | (( (MH "Child+") OR (MH "Infant+") OR (MH "Adolescent")) NOT (( (MH "Adult+") OR (MH "Young Adult") OR (MH "Middle Aged"))))                                                                                                                                                                                           | 1,919,039 | Search modes - Boolean/Phrase |
| 32 | TI (adolescent* or teen or teens or teenager* OR child or childs OR children* or pediatric* or paediatric* OR nursery or newborn* or new born* or infant or infants)                                                                                                                                                   | 1,192,203 | Search modes - Boolean/Phrase |
| 33 | AB (adolescent* or teen or teens or teenager* OR child or childs OR children* or pediatric* or paediatric* OR nursery or newborn* or new born* or infant or infants)                                                                                                                                                   | 1,531,008 | Search modes - Boolean/Phrase |
| 34 | TI (schoolage* or school age* OR school based or school based or kindergar* or preschool* or pre-school* or elementary school* or junior high* or highschool*) or TI (K-12 N2 (student* or school* or education*))                                                                                                     | 37,792    | Search modes - Boolean/Phrase |
| 35 | AB (schoolage* or school age* OR school based or school based or kindergar* or preschool* or pre-school* or elementary school* or junior high* or highschool*) OR AB (K-12 N2 (student* or school* or education*))                                                                                                     | 86,305    | Search modes - Boolean/Phrase |
| 36 | MH ("Schools, Nursery")                                                                                                                                                                                                                                                                                                | 1,481     | Search modes - Boolean/Phrase |
| 37 | S31 OR S32 OR S34 OR S35 OR S36                                                                                                                                                                                                                                                                                        | 2,294,843 | Search modes - Boolean/Phrase |
| 38 | (( AB ((systematic review or scoping review or meta-analy* or metaanyl*)) OR TI (((systematic or scoping or review) N2 (review or reviews)) or scoping review or meta-analy* or metaanyl*)) OR MW ((systematic review or scoping review or meta-analy* or metaanyl*)) ) OR SO (cochrane OR Systematic review*) OR ( AB | 459,697   | Limiters - English Language   |

|    |                                                                                                                                                                                                                      |        |                                                   |
|----|----------------------------------------------------------------------------------------------------------------------------------------------------------------------------------------------------------------------|--------|---------------------------------------------------|
|    | "risk of bias" or quality assessment or data extraction or Pubmed or Medline OR "web of science" or Embase OR CINAHL ) OR (ZT "systematic review") OR (ZT "Meta-analysis") OR TI meta-synthesis OR AB meta-synthesis |        |                                                   |
| 39 | S7 AND (S13 OR S16)                                                                                                                                                                                                  | 50,648 | Search modes - Boolean/Phrase                     |
| 40 | (S13 OR S16) AND S19                                                                                                                                                                                                 | 10,900 | Search modes - Boolean/Phrase                     |
| 41 | S22 AND S19                                                                                                                                                                                                          | 8,979  | Search modes - Boolean/Phrase                     |
| 42 | S39 OR S40 OR S41                                                                                                                                                                                                    | 63,926 | Search modes - Boolean/Phrase                     |
| 43 | S39 OR S40 OR S41                                                                                                                                                                                                    | 60,374 | Narrow by Language: - english                     |
| 44 | S39 OR S40 OR S41                                                                                                                                                                                                    | 39,095 | Limiters - Date of Publication: 20100101-20211231 |
| 45 | S44 AND S29                                                                                                                                                                                                          | 10,798 | Limiters - Date of Publication: 20100101-20211231 |
| 46 | S45 NOT S30                                                                                                                                                                                                          | 10,493 | Limiters - Date of Publication: 20100101-20211231 |
| 47 | S46 NOT S37                                                                                                                                                                                                          | 8,787  | Search modes - Boolean/Phrase                     |
| 48 | S38 AND S43                                                                                                                                                                                                          | 3,355  | Search modes - Boolean/Phrase                     |
| 49 | S48 NOT S37                                                                                                                                                                                                          | 2,737  | Search modes - Boolean/Phrase                     |
| 50 | S48 NOT S37                                                                                                                                                                                                          | 496    | Limiters - Date of Publication: 20200101-20211231 |

## CINAHL

| #  | Query [CINAHL, Ebsco Host, April 2, 2021]                                                                                                                                                                                          | Results | Last Run Via                             |
|----|------------------------------------------------------------------------------------------------------------------------------------------------------------------------------------------------------------------------------------|---------|------------------------------------------|
| 1  | (MH "Diet+") OR (MH "Food Intake+")                                                                                                                                                                                                | 126,163 | Interface - EBSCOhost Research Databases |
| 2  | TI (diet or diets or dietary or nutrition* ) OR AB (diet or diets)                                                                                                                                                                 | 140,498 | Interface - EBSCOhost Research Databases |
| 3  | MH "Eating"                                                                                                                                                                                                                        | 6,804   | Interface - EBSCOhost Research Databases |
| 4  | TI eating                                                                                                                                                                                                                          | 18,473  | Interface - EBSCOhost Research Databases |
| 5  | AB (eating habit or eating habits) OR AB (dietary intake OR dietary habit*)                                                                                                                                                        | 21,649  | Interface - EBSCOhost Research Databases |
| 6  | AB ((healthy OR unhealthy or nutritional) N2 (eating or meal or meals))                                                                                                                                                            | 6,787   | Interface - EBSCOhost Research Databases |
| 7  | S1 OR S2 OR S3 OR S4 OR S5 OR S6                                                                                                                                                                                                   | 237,193 | Interface - EBSCOhost Research Databases |
| 8  | (MH "Exercise+") OR (MH "Physical Fitness+")                                                                                                                                                                                       | 130,435 | Interface - EBSCOhost Research Databases |
| 9  | TI (exercise or exercising or exercised or physical activity or physical activities OR aerobic activity or aerobic activities OR ((aerobic* or fitness or pilates or yoga) N2 (class or classes))                                  | 133,285 | Interface - EBSCOhost Research Databases |
| 10 | AB (physical activity or physical activities or physical fitness or fitness routine or fitness class or fitness classes or aerobic exercis*) OR AB ((regular or daily or routine or weekly or week or weeks) N2 (exercis* or gym)) | 70,332  | Interface - EBSCOhost Research Databases |
| 11 | TI ((regular or daily or routine or weekly or week or weeks) N2 gym)                                                                                                                                                               | 6       | Interface - EBSCOhost Research Databases |

|    |                                                                                                                                                                                                                                                                                                                                                            |         |                                          |
|----|------------------------------------------------------------------------------------------------------------------------------------------------------------------------------------------------------------------------------------------------------------------------------------------------------------------------------------------------------------|---------|------------------------------------------|
| 12 | AB (aerobic activity or aerobic activities OR ((aerobic* or fitness or pilates or yoga) N2 (class or classes)))                                                                                                                                                                                                                                            | 1,811   | Interface - EBSCOhost Research Databases |
| 13 | S8 OR S9 OR S10 OR S11 OR S12                                                                                                                                                                                                                                                                                                                              | 220,224 | Interface - EBSCOhost Research Databases |
| 14 | MH "Muscle Strength+"                                                                                                                                                                                                                                                                                                                                      | 26,077  | Interface - EBSCOhost Research Databases |
| 15 | TI anthropomorphic* measur* OR AB anthropomorphic* measur*                                                                                                                                                                                                                                                                                                 | 139     | Interface - EBSCOhost Research Databases |
| 16 | S14 OR S15                                                                                                                                                                                                                                                                                                                                                 | 26,211  | Interface - EBSCOhost Research Databases |
| 17 | ( (MH "Cognitive Therapy+") OR (MH "Behavior Therapy+") ) OR ( (MH "Motivational Interviewing") OR (MH "Peer Counseling") OR (MH "Anticipatory Guidance") ) OR (MH "Nutritional Counseling") )                                                                                                                                                             | 43,414  | Interface - EBSCOhost Research Databases |
| 18 | ( TI (counseling or counselling or counselor* or counsellor* or motivational interview* or directive therapy or ((behavior* or behaviour*) N2 (intervention or interventions OR therapy or therapies))) ) OR ( AB (counseling or counselling OR motivational interview* or directive therapy or ((behavior* or behaviour*) N2 (therapy or therapies))) ) ) | 68,980  | Interface - EBSCOhost Research Databases |
| 19 | S17 OR S18                                                                                                                                                                                                                                                                                                                                                 | 99,227  | Interface - EBSCOhost Research Databases |
| 20 | MH "Obesity+"                                                                                                                                                                                                                                                                                                                                              | 103,807 | Interface - EBSCOhost Research Databases |
| 21 | TI (overweight or obese or obesity) OR AB (overweight or obese or obesity)                                                                                                                                                                                                                                                                                 | 113,095 | Interface - EBSCOhost Research Databases |
| 22 | S20 OR S21                                                                                                                                                                                                                                                                                                                                                 | 144,974 | Interface - EBSCOhost Research Databases |

|    |                                                                                                                                             |         |                                          |
|----|---------------------------------------------------------------------------------------------------------------------------------------------|---------|------------------------------------------|
| 23 | (MH "Randomized Controlled Trials as Topic+")                                                                                               | 2,040   | Interface - EBSCOhost Research Databases |
| 24 | (ZT "randomized controlled trial")                                                                                                          | 128,380 | Interface - EBSCOhost Research Databases |
| 25 | ( TI (randomised or randomized) ) OR ( AB (randomized or randomised or randomly))                                                           | 319,894 | Interface - EBSCOhost Research Databases |
| 26 | (ZT "controlled clinical trial")                                                                                                            | 54      | Interface - EBSCOhost Research Databases |
| 27 | TI (placebo*) OR AB (placebo*)                                                                                                              | 64,955  | Interface - EBSCOhost Research Databases |
| 28 | (MH "Randomized Controlled Trial")                                                                                                          | 1,528   | Interface - EBSCOhost Research Databases |
| 29 | S23 OR S24 OR S25 OR S26 OR S27 OR S28                                                                                                      | 362,532 | Interface - EBSCOhost Research Databases |
| 30 | MH ("Animals+") NOT MH ("humans")                                                                                                           | 96,658  | Interface - EBSCOhost Research Databases |
| 31 | S7 AND (S13 OR S16)                                                                                                                         | 32,898  | Interface - EBSCOhost Research Databases |
| 32 | (S13 OR S16) AND S19                                                                                                                        | 5,855   | Interface - EBSCOhost Research Databases |
| 33 | S22 AND S19                                                                                                                                 | 4,260   | Interface - EBSCOhost Research Databases |
| 34 | S31 OR S32 OR S33                                                                                                                           | 39,502  | Interface - EBSCOhost Research Databases |
| 35 | S29 AND S34                                                                                                                                 | 6,896   | Interface - EBSCOhost Research Databases |
| 36 | S35 NOT S30                                                                                                                                 | 6,882   | Interface - EBSCOhost Research Databases |
| 37 | ( (MH "Child+") OR (MH "Infant+") OR (MH "Adolescence+") ) NOT ( (MH "Adult+") OR (MH "Middle Age") OR (MH "Aged+") OR (MH "Young Adult") ) | 624,210 | Interface - EBSCOhost Research Databases |

|    |                                                                                                                                                                                                                                                                                                                                  |         |                                          |
|----|----------------------------------------------------------------------------------------------------------------------------------------------------------------------------------------------------------------------------------------------------------------------------------------------------------------------------------|---------|------------------------------------------|
| 38 | TI ( adolescent* or teen or teens or teenager* OR child or childs OR children* or pediatric* or paediatric* OR nursery or newborn* or new born* or infant or infants)                                                                                                                                                            | 459,925 | Interface - EBSCOhost Research Databases |
| 39 | AB (adolescent* or teen or teens or teenager* OR child or childs OR children* or pediatric* or paediatric* OR nursery or newborn* or new born* or infant or infants)                                                                                                                                                             | 517,756 | Interface - EBSCOhost Research Databases |
| 40 | TI (schoolage* or school age* OR school based or school based or kindergar* or preschool* or pre-school* or elementary school* or junior high* or highschool*) or TI (K-12 N2 (student* or school* or education*) )                                                                                                              | 20,653  | Interface - EBSCOhost Research Databases |
| 41 | AB (schoolage* or school age* OR school based or school based or kindergar* or preschool* or pre-school* or elementary school* or junior high* or highschool*) OR AB (K-12 N2 (student* or school* or education*))                                                                                                               | 41,203  | Interface - EBSCOhost Research Databases |
| 42 | MH ("Schools, Nursery")                                                                                                                                                                                                                                                                                                          | 1,373   | Interface - EBSCOhost Research Databases |
| 43 | S37 OR S38 OR S40 OR S41 OR S42                                                                                                                                                                                                                                                                                                  | 788,980 | Interface - EBSCOhost Research Databases |
| 44 | S36 NOT S43                                                                                                                                                                                                                                                                                                                      | 5,805   | Interface - EBSCOhost Research Databases |
| 45 | S36 NOT S43                                                                                                                                                                                                                                                                                                                      | 4,637   | Interface - EBSCOhost Research Databases |
| 46 | S36 NOT S43                                                                                                                                                                                                                                                                                                                      | 4,553   | Interface - EBSCOhost Research Databases |
| 47 | ( AB ( (systematic review or scoping review or meta-analy* or metaanyl* ) ) OR TI ( ((systematic or scoping or review) N2 (review or reviews)) or scoping review or meta-analy* or metaanyl* ) ) OR MW ( (systematic review or scoping review or meta-analy* or metaanyl* ) ) ) OR SO ( cochrane OR Systematic review* ) OR ( AB | 240,361 | Interface - EBSCOhost Research Databases |

|    |                                                                                                                                                                                                                      |       |                                          |
|----|----------------------------------------------------------------------------------------------------------------------------------------------------------------------------------------------------------------------|-------|------------------------------------------|
|    | "risk of bias" or quality assessment or data extraction or Pubmed or Medline OR "web of science" or Embase OR CINAHL ) OR (MM "systematic review") OR (MM "Meta-analysis") OR TI meta-synthesis OR AB meta-synthesis |       |                                          |
| 48 | S34 AND S47                                                                                                                                                                                                          | 2,089 | Interface - EBSCOhost Research Databases |
| 49 | S34 AND S47                                                                                                                                                                                                          | 1,784 | Interface - EBSCOhost Research Databases |
| 50 | S34 AND S47                                                                                                                                                                                                          | 280   | Interface - EBSCOhost Research Databases |
| 51 | S46 OR S50                                                                                                                                                                                                           | 4,755 | Interface - EBSCOhost Research Databases |

## Sport Discus

| # | Query [SPORT-DISCUS] April 2, 2021                                                                                                                                                                                                                                                                                                                                                                                                                                                                                                                                                                                                                                                                                                                                                                                                                                                                                                                | Results | Limiters/Expanders               |
|---|---------------------------------------------------------------------------------------------------------------------------------------------------------------------------------------------------------------------------------------------------------------------------------------------------------------------------------------------------------------------------------------------------------------------------------------------------------------------------------------------------------------------------------------------------------------------------------------------------------------------------------------------------------------------------------------------------------------------------------------------------------------------------------------------------------------------------------------------------------------------------------------------------------------------------------------------------|---------|----------------------------------|
| 1 | DE "PHYSICAL fitness & nutrition"                                                                                                                                                                                                                                                                                                                                                                                                                                                                                                                                                                                                                                                                                                                                                                                                                                                                                                                 | 188     | Search modes -<br>Boolean/Phrase |
| 2 | DE "DIET" OR DE "FASTING" OR DE "FOOD portions" OR DE "HIGH-calcium diet" OR DE "HIGH-carbohydrate diet" OR DE "HIGH-fat diet" OR DE "HIGH-fiber diet" OR DE "MEDITERRANEAN diet" OR DE "REDUCING diets" OR DE "TYRAMINE-free diet" OR DE "VEGETARIANISM" OR DE "DIET therapy" OR DE "CASEIN-free diet" OR DE "COMMUNICATION in diet therapy" OR DE "COMPLEX carbohydrate diet" OR DE "ELEMENTAL diet" OR DE "FOOD exchange lists" OR DE "GLUTEN-free diet" OR DE "HIGH-calcium diet" OR DE "HIGH-calorie diet" OR DE "HIGH-carbohydrate diet" OR DE "HIGH-iron diet" OR DE "HIGH-lysine diet" OR DE "HIGH-omega-3 fatty acid diet" OR DE "HIGH-potassium diet" OR DE "HIGH-protein diet" OR DE "HIGH-tryptophan diet" OR DE "LIQUID diet" OR DE "LOW-potassium diet" OR DE "RAW food diet" OR DE "TYRAMINE-free diet" OR DE "WHEAT-free diet" OR DE "YEAST-free diet" OR ((DE "FOOD habits") OR (DE "FOOD portions")) OR (DE "FOOD consumption") | 24,723  | Search modes -<br>Boolean/Phrase |
| 3 | TI eating OR TI (diet or diets or dietary or nutrition* ) OR AB (diet or diets) OR KW (diet or diets or dietary or nutrition* )                                                                                                                                                                                                                                                                                                                                                                                                                                                                                                                                                                                                                                                                                                                                                                                                                   | 53,351  | Search modes -<br>Boolean/Phrase |
| 4 | AB (eating habit or eating habits) OR AB (dietary intake OR dietary habit*) OR TI (food habit\$) OR TI (food consumption) OR KW (food habit\$) OR KW (food consumption)                                                                                                                                                                                                                                                                                                                                                                                                                                                                                                                                                                                                                                                                                                                                                                           | 7,753   | Search modes -<br>Boolean/Phrase |
| 5 | AB ((healthy OR unhealthy or nutritional) N2 (eating or meal or meals)) OR KW ((healthy OR                                                                                                                                                                                                                                                                                                                                                                                                                                                                                                                                                                                                                                                                                                                                                                                                                                                        | 2,665   | Search modes -<br>Boolean/Phrase |

|    |                                                                                                                                                                                                                                                                                                                                                                                                                                                                                                                                                                                                                                                       |        |                                  |
|----|-------------------------------------------------------------------------------------------------------------------------------------------------------------------------------------------------------------------------------------------------------------------------------------------------------------------------------------------------------------------------------------------------------------------------------------------------------------------------------------------------------------------------------------------------------------------------------------------------------------------------------------------------------|--------|----------------------------------|
|    | unhealthy or nutritional) N2 (eating or meal or meals))                                                                                                                                                                                                                                                                                                                                                                                                                                                                                                                                                                                               |        |                                  |
| 6  | S2 OR S3 OR S4 OR S5                                                                                                                                                                                                                                                                                                                                                                                                                                                                                                                                                                                                                                  | 65,187 | Search modes -<br>Boolean/Phrase |
| 7  | (DE "FITNESS walking") AND (DE "PHYSICAL fitness" OR DE "ANAEROBIC exercises" OR DE "CARDIOPULMONARY fitness" OR DE "CARDIOVASCULAR fitness" OR DE "CIRCUIT training" OR DE "COMPOUND exercises" OR DE "EXERCISE tolerance" OR DE "ISOLATION exercises" OR DE "LIANGONG" OR DE "MUSCLE strength" OR DE "PERIODIZATION training" OR DE "PHYSICAL fitness for men" OR DE "PHYSICAL fitness for older people" OR DE "PHYSICAL fitness for people with disabilities" OR DE "PHYSICAL fitness for women" OR DE "SPORT for all" OR DE "PHYSICAL fitness -- Research" OR DE "PHYSICAL fitness centers" OR DE "HOME gyms" OR DE "WEIGHT training facilities") | 115    | Search modes -<br>Boolean/Phrase |
| 8  | TI (exercise or exercising or exercised or physical activity or physical activities OR aerobic activity or aerobic activities) OR TI ((aerobic* or fitness or pilates or yoga) N2 (class or classes))                                                                                                                                                                                                                                                                                                                                                                                                                                                 | 92,081 | Search modes -<br>Boolean/Phrase |
| 9  | AB (physical activity or physical activities or physical fitness or fitness routine or fitness class or fitness classes or aerobic exercis*) OR AB ((regular or daily or routine or weekly or week or weeks) N2 (exercis* or gym)) OR KW ((regular or daily or routine or weekly or week or weeks) N2 (exercis* or gym)) OR KW (physical activity or physical activities or physical fitness or fitness routine or fitness class or fitness classes or aerobic exercis*)                                                                                                                                                                              | 64,792 | Search modes -<br>Boolean/Phrase |
| 10 | TI ((regular or daily or routine or weekly or week or weeks) N2 gym) OR AB (aerobic                                                                                                                                                                                                                                                                                                                                                                                                                                                                                                                                                                   | 2,873  | Search modes -<br>Boolean/Phrase |

|    |                                                                                                                                                                                                                                                                                                                                                          |         |                               |
|----|----------------------------------------------------------------------------------------------------------------------------------------------------------------------------------------------------------------------------------------------------------------------------------------------------------------------------------------------------------|---------|-------------------------------|
|    | activity or aerobic activities OR ((aerobic* or fitness or pilates or yoga) N2 (class or classes))                                                                                                                                                                                                                                                       |         |                               |
| 11 | TI (anthropomorphic N2 (measure* or test or tests or testing)) OR AB (anthropomorphic N2 (measure* or test or tests or testing)) OR KW (anthropomorphic N2 (measure* or test or tests or testing))                                                                                                                                                       | 63      | Search modes - Boolean/Phrase |
| 12 | S7 OR S8 OR S9 OR S10 OR S11                                                                                                                                                                                                                                                                                                                             | 131,903 | Search modes - Boolean/Phrase |
| 13 | (DE "COUNSELING" OR DE "HEALTH counseling" OR DE "LEISURE counseling" OR DE "MENTORING" OR DE "MOTIVATIONAL interviewing") OR (DE "COGNITIVE therapy")                                                                                                                                                                                                   | 4,647   | Search modes - Boolean/Phrase |
| 14 | ( TI (counseling or counselling or counselor* or counsellor* or motivational interview* or directive therapy or ((behavior* or behaviour*) N2 (intervention or interventions OR therapy or therapies))) ) OR ( AB (counseling or counselling OR motivational interview* or directive therapy or ((behavior* or behaviour*) N2 (therapy or therapies))) ) | 7,097   | Search modes - Boolean/Phrase |
| 15 | S13 OR S14                                                                                                                                                                                                                                                                                                                                               | 9,794   | Search modes - Boolean/Phrase |
| 16 | DE "OVERWEIGHT persons" OR DE "OVERWEIGHT men" OR DE "OVERWEIGHT women" OR DE "obesity"                                                                                                                                                                                                                                                                  | 13,922  | Search modes - Boolean/Phrase |
| 17 | TI (overweight or obese or obesity) OR AB (overweight or obese or obesity)                                                                                                                                                                                                                                                                               | 27,772  | Search modes - Boolean/Phrase |
| 18 | S16 OR S17                                                                                                                                                                                                                                                                                                                                               | 29,920  | Search modes - Boolean/Phrase |
| 19 | ( TI (randomised or randomized) ) OR ( AB (randomized or randomised or randomly))                                                                                                                                                                                                                                                                        | 48,909  | Search modes - Boolean/Phrase |
| 20 | TI (controlled N2 trial) OR AB (controlled N2 trial) OR KW (controlled N2 trial)                                                                                                                                                                                                                                                                         | 15,995  | Search modes - Boolean/Phrase |
| 21 | TI (placebo*) OR AB (placebo*)                                                                                                                                                                                                                                                                                                                           | 12,287  | Search modes - Boolean/Phrase |

|    |                                                                                                                                                                                                                                                                                                                                                                                                                                                                                                          |        |                                  |
|----|----------------------------------------------------------------------------------------------------------------------------------------------------------------------------------------------------------------------------------------------------------------------------------------------------------------------------------------------------------------------------------------------------------------------------------------------------------------------------------------------------------|--------|----------------------------------|
| 22 | S19 OR S20 OR S21                                                                                                                                                                                                                                                                                                                                                                                                                                                                                        | 55,426 | Search modes -<br>Boolean/Phrase |
| 23 | DE "ANIMAL body composition" OR DE "ANIMAL breeding" OR DE "ANIMAL diseases" OR DE "ANIMAL feeds" OR DE "ANIMAL fighting" OR DE "ANIMAL grooming" OR DE "ANIMAL locomotion" OR DE "ANIMAL jumping" OR DE "ANIMAL mechanics" OR DE "ANIMAL locomotion" OR DE "ANIMAL models in food consumption research" OR TI animal# OR AB "animal model#" or KW "animal model#"                                                                                                                                       | 5,469  | Search modes -<br>Boolean/Phrase |
| 24 | (DE "CHILDREN" OR DE "AIDS & children" OR DE "BOYS" OR DE "CHILD acrobats" OR DE "CHILD circus performers" OR DE "CHILD dancers" OR DE "CHILD development" OR DE "DANCE for children" OR DE "DEAFBLIND children" OR DE "GIRLS" OR DE "OUTDOOR recreation for children" OR DE "SCHOOL children" OR DE "SELF-defense for children" OR DE "VIDEO games & children") OR (DE "TEENAGERS" OR DE "OVERWEIGHT teenagers" OR DE "VIDEO games & teenagers") OR (DE "PEDIATRIC nutritionists") OR (DE "PEDIATRICS") | 65,707 | Search modes -<br>Boolean/Phrase |
| 25 | TI ( adolescent* or teen or teens or teenager* OR child or childs OR children* or pediatric* or paediatric* OR nursery or newborn* or new born* or infant or infants)                                                                                                                                                                                                                                                                                                                                    | 56,872 | Search modes -<br>Boolean/Phrase |
| 26 | AB (adolescent* or teen or teens or teenager* OR child or childs OR children* or pediatric* or paediatric* OR nursery or newborn* or new born* or infant or infants)                                                                                                                                                                                                                                                                                                                                     | 88,118 | Search modes -<br>Boolean/Phrase |
| 27 | TI (schoolage* or school age* OR school based or school based or kindergar* or preschool* or pre-school* or elementary school* or junior high* or highschool*) or TI (K-12 N2 (student* or school* or education*) )                                                                                                                                                                                                                                                                                      | 7,125  | Search modes -<br>Boolean/Phrase |

|    |                                                                                                                                                                                                                                                                                                                                                                                                                                                                                                                                                                              |         |                                              |
|----|------------------------------------------------------------------------------------------------------------------------------------------------------------------------------------------------------------------------------------------------------------------------------------------------------------------------------------------------------------------------------------------------------------------------------------------------------------------------------------------------------------------------------------------------------------------------------|---------|----------------------------------------------|
| 28 | AB (schoolage* or school age* OR school based or school based or kindergar* or preschool* or pre-school* or elementary school* or junior high* or highschool*) OR AB (K-12 N2 (student* or school* or education*))                                                                                                                                                                                                                                                                                                                                                           | 14,759  | Search modes - Boolean/Phrase                |
| 29 | S24 OR S25 OR S27 OR S28                                                                                                                                                                                                                                                                                                                                                                                                                                                                                                                                                     | 111,519 | Search modes - Boolean/Phrase                |
| 30 | ( AB ( (systematic review or scoping review or meta-analy* or metaanyl* ) ) OR TI ( ((systematic or scoping or review) N2 (review or reviews)) or scoping review or meta-analy* or metaanyl* ) ) OR MW ( (systematic review or scoping review or meta-analy* or metaanyl* ) ) OR SO ( cochrane OR Systematic review* ) OR ( AB "risk of bias" or quality assessment or data extraction or Pubmed or Medline OR "web of science" or Embase OR CINAHL ) OR TI meta-synthesis OR AB meta-synthesis OR KW ( (systematic review or scoping review or meta-analy* or metaanyl* ) ) | 20,653  | Search modes - Boolean/Phrase                |
| 31 | S1 OR (S6 AND S12)                                                                                                                                                                                                                                                                                                                                                                                                                                                                                                                                                           | 8,798   | Search modes - Boolean/Phrase                |
| 32 | S12 AND S15                                                                                                                                                                                                                                                                                                                                                                                                                                                                                                                                                                  | 1,081   | Search modes - Boolean/Phrase                |
| 33 | S18 AND S15                                                                                                                                                                                                                                                                                                                                                                                                                                                                                                                                                                  | 507     | Search modes - Boolean/Phrase                |
| 34 | S31 OR S32 OR S33                                                                                                                                                                                                                                                                                                                                                                                                                                                                                                                                                            | 9,979   | Search modes - Boolean/Phrase                |
| 35 | (S34 AND S22) NOT (S23 OR S29)                                                                                                                                                                                                                                                                                                                                                                                                                                                                                                                                               | 1,374   | Search modes - Boolean/Phrase                |
| 36 | (S34 AND S22) NOT (S23 OR S29)                                                                                                                                                                                                                                                                                                                                                                                                                                                                                                                                               | 971     | Limiters - Published Date: 20100101-20211231 |
| 37 | (S34 AND S22) NOT (S23 OR S29)                                                                                                                                                                                                                                                                                                                                                                                                                                                                                                                                               | 971     | Limiters - Published Date: 20100101-20211231 |
| 38 | S34 AND S30                                                                                                                                                                                                                                                                                                                                                                                                                                                                                                                                                                  | 261     | Limiters - Published Date: 20100101-20211231 |

|    |             |     |                                                     |
|----|-------------|-----|-----------------------------------------------------|
| 39 | S34 AND S30 | 34  | Limiters - Published<br>Date: 20200101-<br>20211231 |
| 40 | S34 AND S30 | 34  | Limiters - Published<br>Date: 20200101-<br>20211231 |
| 41 | S37 OR S40  | 989 | Search modes -<br>Boolean/Phrase                    |

Cochrane Database of Systematic Reviews

| #  | Query Cochrane Database of Systematic Reviews, Ebsco, March 28, 2021]                                                                                                                                                                                                                                                                                    | Results |
|----|----------------------------------------------------------------------------------------------------------------------------------------------------------------------------------------------------------------------------------------------------------------------------------------------------------------------------------------------------------|---------|
| 1  | (MM "Diet")                                                                                                                                                                                                                                                                                                                                              | 12      |
| 2  | TI (diet or diets or dietary or nutrition* ) OR AB (diet or diets)                                                                                                                                                                                                                                                                                       | 430     |
| 3  | MM "Eating"                                                                                                                                                                                                                                                                                                                                              | 6       |
| 4  | TI eating                                                                                                                                                                                                                                                                                                                                                | 6       |
| 5  | AB (eating habit or eating habits) OR AB (dietary intake OR dietary habit*)                                                                                                                                                                                                                                                                              | 82      |
| 6  | AB ((healthy OR unhealthy or nutritional) N2 (eating or meal or meals))                                                                                                                                                                                                                                                                                  | 19      |
| 7  | S1 OR S2 OR S3 OR S4 OR S5 OR S6                                                                                                                                                                                                                                                                                                                         | 466     |
| 8  | (MM "Exercise+") OR (MM "Physical Fitness+")                                                                                                                                                                                                                                                                                                             | 53      |
| 9  | TI (exercise or exercising or exercised or physical activity or physical activities OR aerobic activity or aerobic activities) OR TI ((aerobic* or fitness or pilates or yoga) N2 (class or classes))                                                                                                                                                    | 238     |
| 10 | AB (physical activity or physical activities or physical fitness or fitness routine or fitness class or fitness classes or aerobic exercis*) OR AB ((regular or daily or routine or weekly or week or weeks) N2 (exercis* or gym))                                                                                                                       | 258     |
| 11 | TI ((regular or daily or routine or weekly or week or weeks) N2 gym)                                                                                                                                                                                                                                                                                     | 3       |
| 12 | AB (aerobic activity or aerobic activities OR ((aerobic* or fitness or pilates or yoga) N2 (class or classes))                                                                                                                                                                                                                                           | 11      |
| 13 | S8 OR S9 OR S10 OR S11 OR S12                                                                                                                                                                                                                                                                                                                            | 378     |
| 14 | MM "Muscle Strength+"                                                                                                                                                                                                                                                                                                                                    | 110     |
| 15 | TI anthropomorphic* measur* OR AB anthropomorphic* measur*                                                                                                                                                                                                                                                                                               | 0       |
| 16 | S14 OR S15                                                                                                                                                                                                                                                                                                                                               | 0       |
| 17 | ( (MM "Cognitive Therapy+") OR (MM "Behavior Therapy+") ) OR ( (MM "Motivational Interviewing") OR (MM "Peer Counseling") OR (MM "Anticipatory Guidance") ) OR (MM "Nutritional Counseling")                                                                                                                                                             | 1       |
| 18 | ( TI (counseling or counselling or counselor* or counsellor* or motivational interview* or directive therapy or ((behavior* or behaviour*) N2 (intervention or interventions OR therapy or therapies))) ) OR ( AB (counseling or counselling OR motivational interview* or directive therapy or ((behavior* or behaviour*) N2 (therapy or therapies))) ) | 493     |
| 19 | S17 OR S18                                                                                                                                                                                                                                                                                                                                               | 493     |

|    |                                                                                                                                                                                                                     |       |
|----|---------------------------------------------------------------------------------------------------------------------------------------------------------------------------------------------------------------------|-------|
| 20 | MM "Obesity+"                                                                                                                                                                                                       | 2     |
| 21 | TI (overweight or obese or obesity) OR AB (overweight or obese or obesity)                                                                                                                                          | 197   |
| 22 | S20 OR S21                                                                                                                                                                                                          | 197   |
| 23 | S7 AND (S13 OR S16)                                                                                                                                                                                                 | 61    |
| 24 | (S13 OR S16) AND S19                                                                                                                                                                                                | 32    |
| 25 | S22 AND S19                                                                                                                                                                                                         | 22    |
| 26 | S23 OR S24 OR S25                                                                                                                                                                                                   | 98    |
| 27 | ( (MM "Child+") OR (MM "Infant+") OR (MM "Adolescence+") ) NOT ( (MM "Adult+") OR (MM "Middle Age") OR (MM "Aged+") OR (MM "Young Adult") ) )                                                                       | 42    |
| 28 | TI ( adolescent* or teen or teens or teenager* OR child or childs OR children* or pediatric* or paediatric* OR nursery or newborn* or new born* or infant or infants)                                               | 1,330 |
| 29 | AB (adolescent* or teen or teens or teenager* OR child or childs OR children* or pediatric* or paediatric* OR nursery or newborn* or new born* or infant or infants)                                                | 2,908 |
| 30 | TI (schoolage* or school age* OR school based or school based or kindergar* or preschool* or pre-school* or elementary school* or junior high* or highschool*) or TI (K-12 N2 (student* or school* or education*) ) | 32    |
| 31 | AB (schoolage* or school age* OR school based or school based or kindergar* or preschool* or pre-school* or elementary school* or junior high* or highschool*) OR AB (K-12 N2 (student* or school* or education*))  | 114   |
| 32 | MM ("Schools, Nursery")                                                                                                                                                                                             | 1     |
| 33 | S27 OR S28 OR S30 OR S31 OR S32                                                                                                                                                                                     | 1,379 |
| 34 | S26 NOT S33                                                                                                                                                                                                         | 81    |
| 35 | S26 NOT S33                                                                                                                                                                                                         | 9     |

#### Cochrane Central

| # | QUERY {Cochrane Central Register of Controlled Trials, Ebsco; search date April 2, 2021} | Results |
|---|------------------------------------------------------------------------------------------|---------|
| 1 | (MM "Diet")                                                                              | 2,342   |
| 2 | TI (diet or diets or dietary or nutrition* ) OR AB (diet or diets)                       | 62,655  |
| 3 | MM "Eating"                                                                              | 413     |

|    |                                                                                                                                                                                                                                                                                                                                                          |        |
|----|----------------------------------------------------------------------------------------------------------------------------------------------------------------------------------------------------------------------------------------------------------------------------------------------------------------------------------------------------------|--------|
| 4  | TI eating                                                                                                                                                                                                                                                                                                                                                | 3,651  |
| 5  | AB (eating habit or eating habits) OR AB (dietary intake OR dietary habit*)                                                                                                                                                                                                                                                                              | 10,588 |
| 6  | AB ((healthy OR unhealthy or nutritional) N2 (eating or meal or meals))                                                                                                                                                                                                                                                                                  | 2,573  |
| 7  | S1 OR S2 OR S3 OR S4 OR S5 OR S6                                                                                                                                                                                                                                                                                                                         | 70,872 |
| 8  | (MM "Exercise+") OR (MM "Physical Fitness+")                                                                                                                                                                                                                                                                                                             | 11,515 |
| 9  | TI (exercise or exercising or exercised or physical activity or physical activities OR aerobic activity or aerobic activities) OR TI ((aerobic* or fitness or pilates or yoga) N2 (class or classes))                                                                                                                                                    | 55,323 |
| 10 | AB (physical activity or physical activities or physical fitness or fitness routine or fitness class or fitness classes or aerobic exercis*) OR AB ((regular or daily or routine or weekly or week or weeks) N2 (exercis* or gym))                                                                                                                       | 42,911 |
| 11 | TI ((regular or daily or routine or weekly or week or weeks) N2 gym)                                                                                                                                                                                                                                                                                     | 2      |
| 12 | AB (aerobic activity or aerobic activities OR ((aerobic* or fitness or pilates or yoga) N2 (class or classes))                                                                                                                                                                                                                                           | 1,536  |
| 13 | S8 OR S9 OR S10 OR S11 OR S12                                                                                                                                                                                                                                                                                                                            | 78,196 |
| 14 | MM "Muscle Strength+"                                                                                                                                                                                                                                                                                                                                    | 22,491 |
| 15 | TI anthropomorphic* measur* OR AB anthropomorphic* measur*                                                                                                                                                                                                                                                                                               | 60     |
| 16 | S14 OR S15                                                                                                                                                                                                                                                                                                                                               | 60     |
| 17 | ( (MM "Cognitive Therapy+") OR (MM "Behavior Therapy+") ) OR ( (MM "Motivational Interviewing") OR (MM "Peer Counseling") OR (MM "Anticipatory Guidance") ) OR (MM "Nutritional Counseling")                                                                                                                                                             | 706    |
| 18 | ( TI (counseling or counselling or counselor* or counsellor* or motivational interview* or directive therapy or ((behavior* or behaviour*) N2 (intervention or interventions OR therapy or therapies))) ) OR ( AB (counseling or counselling OR motivational interview* or directive therapy or ((behavior* or behaviour*) N2 (therapy or therapies))) ) | 39,707 |
| 19 | S17 OR S18                                                                                                                                                                                                                                                                                                                                               | 39,707 |
| 20 | MM "Obesity+"                                                                                                                                                                                                                                                                                                                                            | 1,445  |
| 21 | TI (overweight or obese or obesity) OR AB (overweight or obese or obesity)                                                                                                                                                                                                                                                                               | 44,932 |
| 22 | S20 OR S21                                                                                                                                                                                                                                                                                                                                               | 44,932 |
| 23 | S7 AND (S13 OR S16)                                                                                                                                                                                                                                                                                                                                      | 11,072 |
| 24 | (S13 OR S16) AND S19                                                                                                                                                                                                                                                                                                                                     | 4,157  |
| 25 | S22 AND S19                                                                                                                                                                                                                                                                                                                                              | 2,687  |
| 26 | S23 OR S24 OR S25                                                                                                                                                                                                                                                                                                                                        | 15,383 |

|    |                                                                                                                                                                                                                     |         |
|----|---------------------------------------------------------------------------------------------------------------------------------------------------------------------------------------------------------------------|---------|
| 27 | ( (MM "Child+") OR (MM "Infant+") OR (MM "Adolescence+") ) NOT ( (MM "Adult+") OR (MM "Middle Age") OR (MM "Aged+") OR (MM "Young Adult") ) )                                                                       | 52,587  |
| 28 | TI ( adolescent* or teen or teens or teenager* OR child or childs OR children* or pediatric* or paediatric* OR nursery or newborn* or new born* or infant or infants)                                               | 129,966 |
| 29 | AB (adolescent* or teen or teens or teenager* OR child or childs OR children* or pediatric* or paediatric* OR nursery or newborn* or new born* or infant or infants)                                                | 159,368 |
| 30 | TI (schoolage* or school age* OR school based or school based or kindergar* or preschool* or pre-school* or elementary school* or junior high* or highschool*) or TI (K-12 N2 (student* or school* or education*) ) | 6,809   |
| 31 | AB (schoolage* or school age* OR school based or school based or kindergar* or preschool* or pre-school* or elementary school* or junior high* or highschool*) OR AB (K-12 N2 (student* or school* or education*))  | 12,197  |
| 32 | MM ("Schools, Nursery")                                                                                                                                                                                             | 146     |
| 33 | S27 OR S28 OR S30 OR S31 OR S32                                                                                                                                                                                     | 136,692 |
| 34 | S26 NOT S33                                                                                                                                                                                                         | 13,483  |
| 35 | S26 NOT S33                                                                                                                                                                                                         | 10,769  |
| 36 | conference abstract                                                                                                                                                                                                 | 188,510 |
| 37 | S35 NOT S36                                                                                                                                                                                                         | 9,120   |
| 38 | S35 NOT S36                                                                                                                                                                                                         | 9,120   |
| 39 | S35 NOT S36                                                                                                                                                                                                         | 9,120   |
| 40 | S35 NOT S36                                                                                                                                                                                                         | 9,120   |
| 41 | S35 NOT S36                                                                                                                                                                                                         | 9,120   |
